# Supplementary material
Source: Springer Nature journal article supplement (https://www.springermedizin.de/resource/supplementary/12957_2008_516_MOESM2_ESM.pdf/9564894)

Ex: 13439

82117794 C g e

Se: 2

M 82117794

XY 124.03

Dn: 8

Aug 15 2006

DFOV 41.9cm

512

STND/+

MF:1.1

R  
1  
8  
8

L  
1  
9  
3

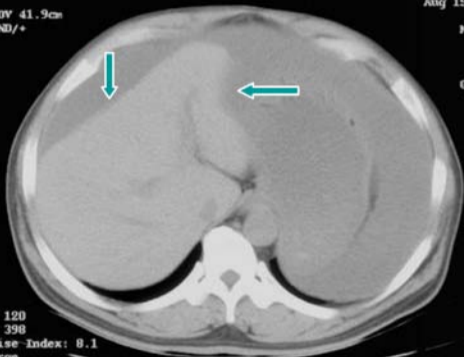

GSE:q1

kV 120

mAs 398

Noise Index: 8.1

Large

10.000mm/27.00 1.35:1

Tilt: 0.0

0.8s /ME+ 04:31:00/02.07

W:400 L:40

Supplement: MOESM2 [file 9564894]
